# Supplementary material for: Intracellular Targeting of the Oncogenic MUC1-C Protein with a Novel GO-203 Nanoparticle Formulation
Source: Oxford University Press journal article supplement (doi:10.1158/1078-0432.ccr-14-3000), 2015-02-26
Supplement: 10780432ccr143000-sup-140929_1_supp_2825189_nkk7t2.docx [file 10780432ccr143000-sup-140929_1_supp_2825189_nkk7t2.docx]

**Supplemental Figure Legend**

**Supplemental Figure S1. GO-203/NPs inhibit NSCLC cell self-renewal.** A. H1975 cells were seeded at 1000 cells/well in 6-well plates and left untreated (Control) or treated with 7.5 μM GO-203/NPs or an equal amount of empty NPs on day 0. NP containing media was replaced with fresh media on day 3. Colonies were stained with crystal violet on day 15 after treatment (upper panels). Colony number (>30 cells) is expressed as the mean±SD of three replicates (lower panel). B. H460 cells were seeded at 500 cells/well in 6-well plates and left untreated (Control) or treated with 7.5 μM GO-203/NP or an equal amount of empty NPs on day 0. NP containing media was replaced with fresh media on day 3. Colonies were stained with crystal violet on day 10 after treatment (upper panels). Colony number (>30 cells) is expressed as the mean±SD of three replicates (lower panel). C. H1975 cells were left untreated (Control) or treated with 7.5 μM GO-203/NPs or CP-2/NPs once on day 0 and then plated at 2000 cells/well in sphere culture on day 2. Representative images are shown for the indicated H1975 cells grown for 5 days post-treatment in sphere culture (upper panels). Bar represents 100 microns. The percentage SFE is expressed as the mean±SD of three determinations (lower panel). D. H460 cells were left untreated (Control) or treated with 7.5 μM GO-203/NPs or CP-2/NPs once on day 0 and then plated at 500 cells/well in sphere culture on day 2. Representative images are shown for the indicated H460 cells grown for 5 days post-treatment in sphere culture (upper panels). Bar represents 100 microns. The percentage SFE is expressed as the mean±SD of three determinations (lower panel).
